# Supplementary material for: Quantifying fluorescent glycan uptake to elucidate strain-level variability in foraging behaviors of rumen bacteria
Source: PubMed Central journal article supplement (PMC7825182; doi:10.1186/s40168-020-00975-x), 2021-01-22

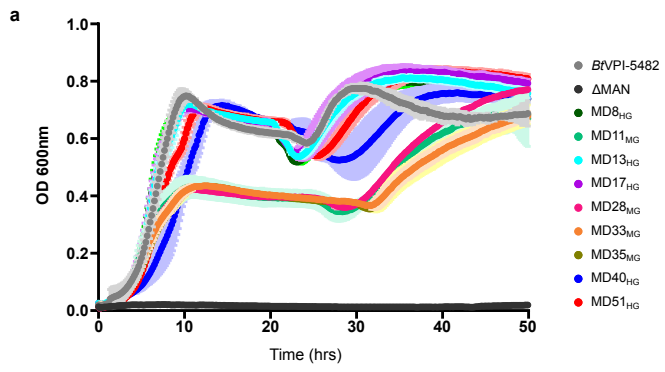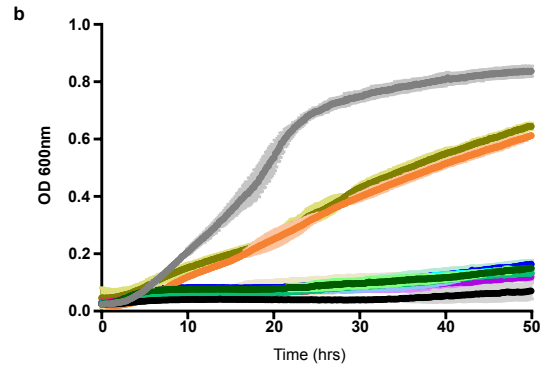

Supplemental Figure 1, Klassen and Reintjes et al., 2020

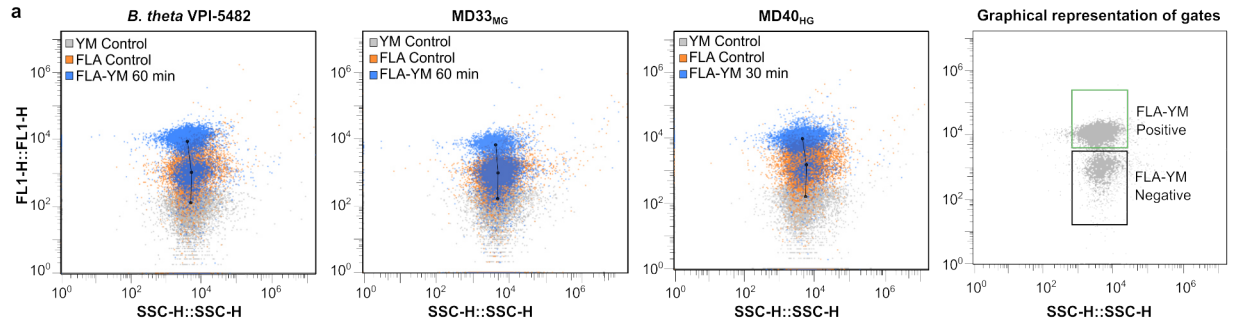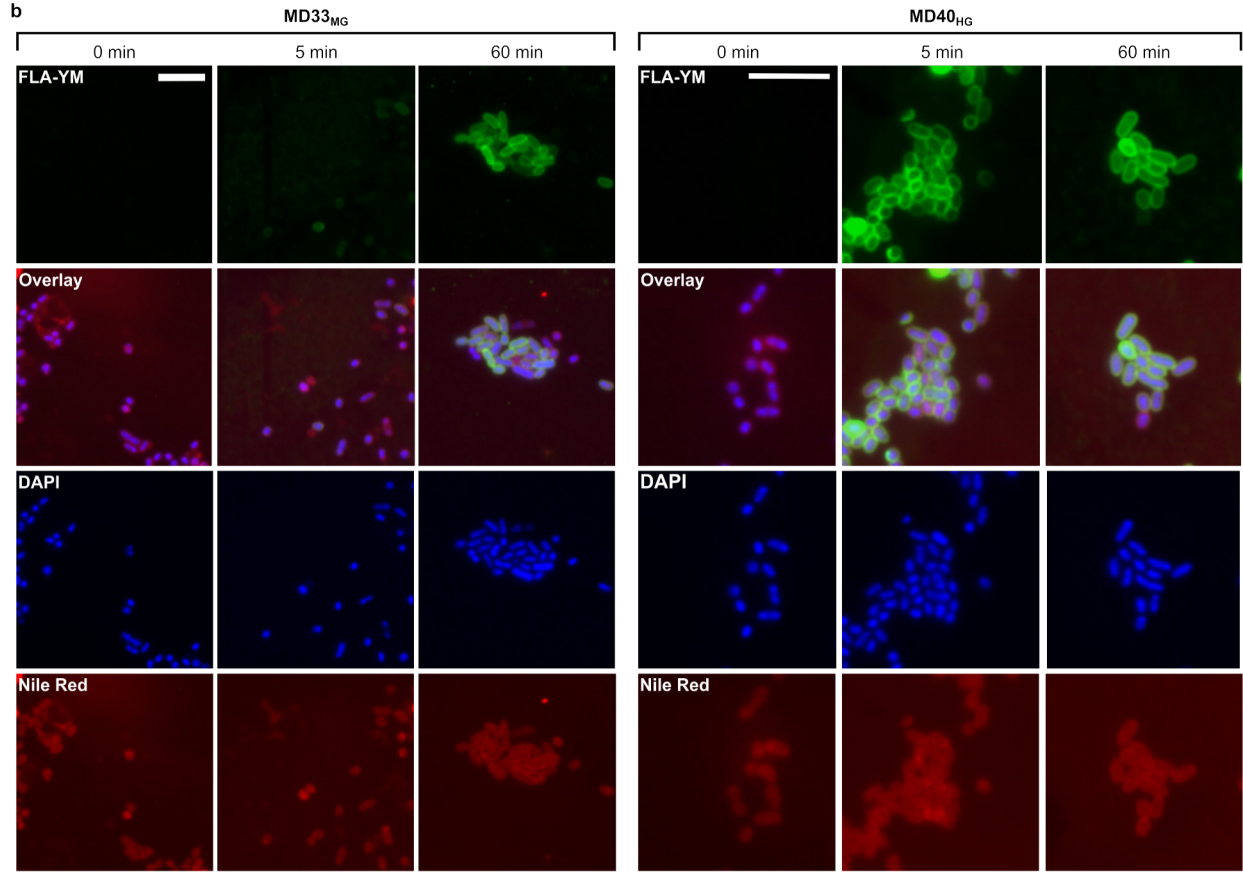

Supplemental Figure 2, Klassen and Reintjes et al., 2020

**PUL85 (Heparin PUL)**

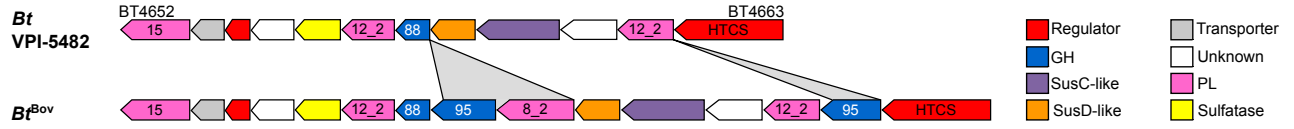

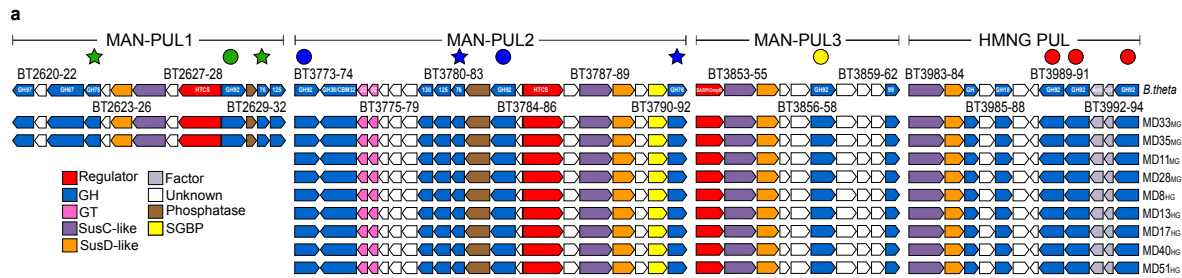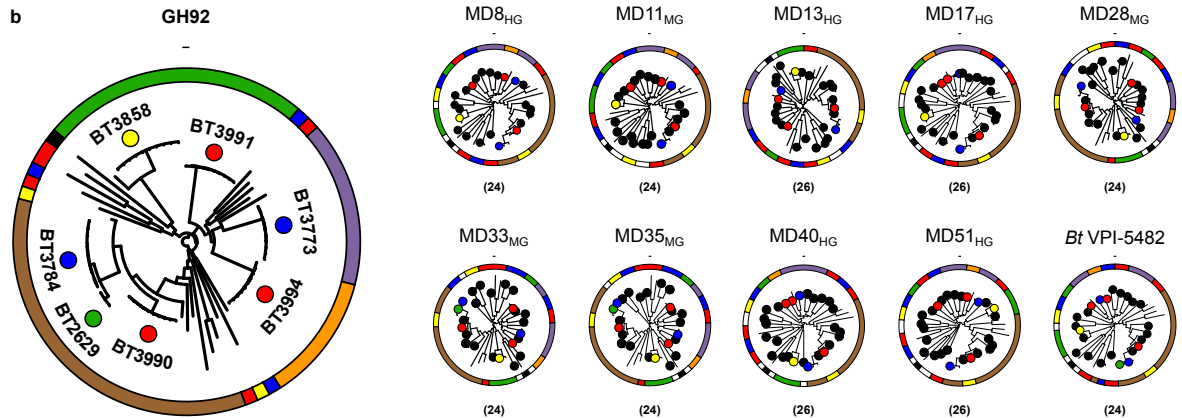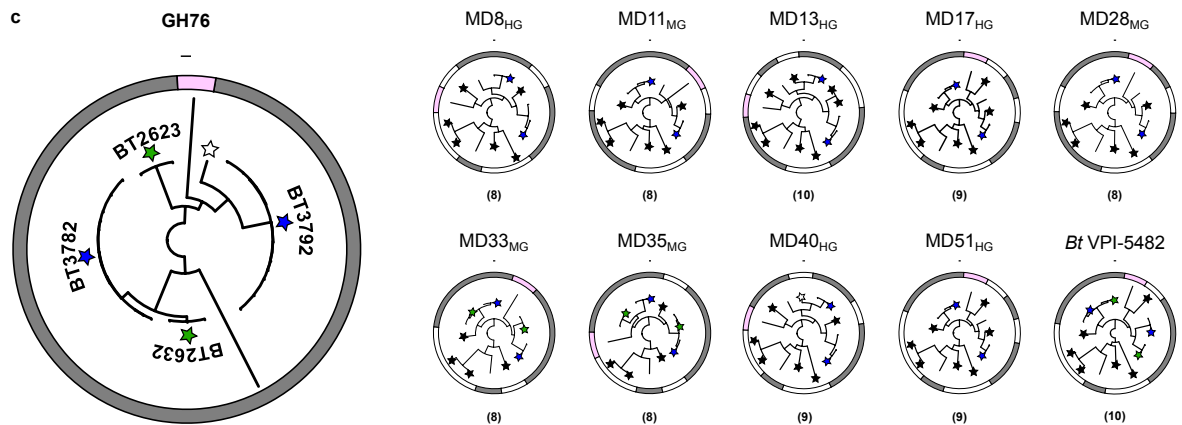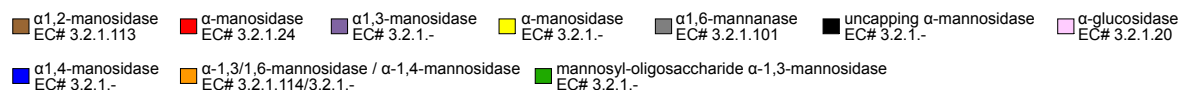

Supplemental Figure 4, Klassen and Reintjes et al., 2020

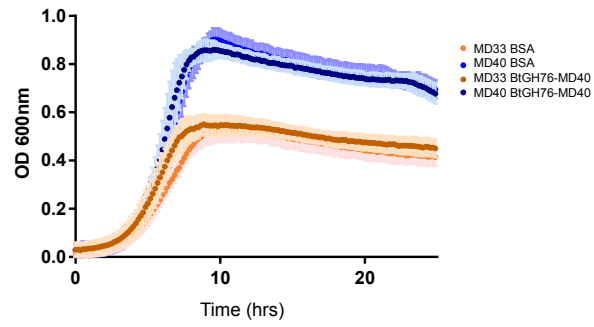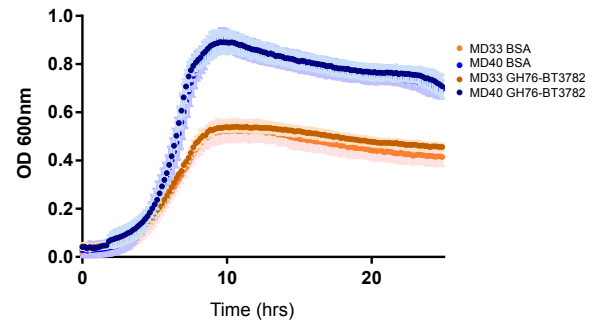

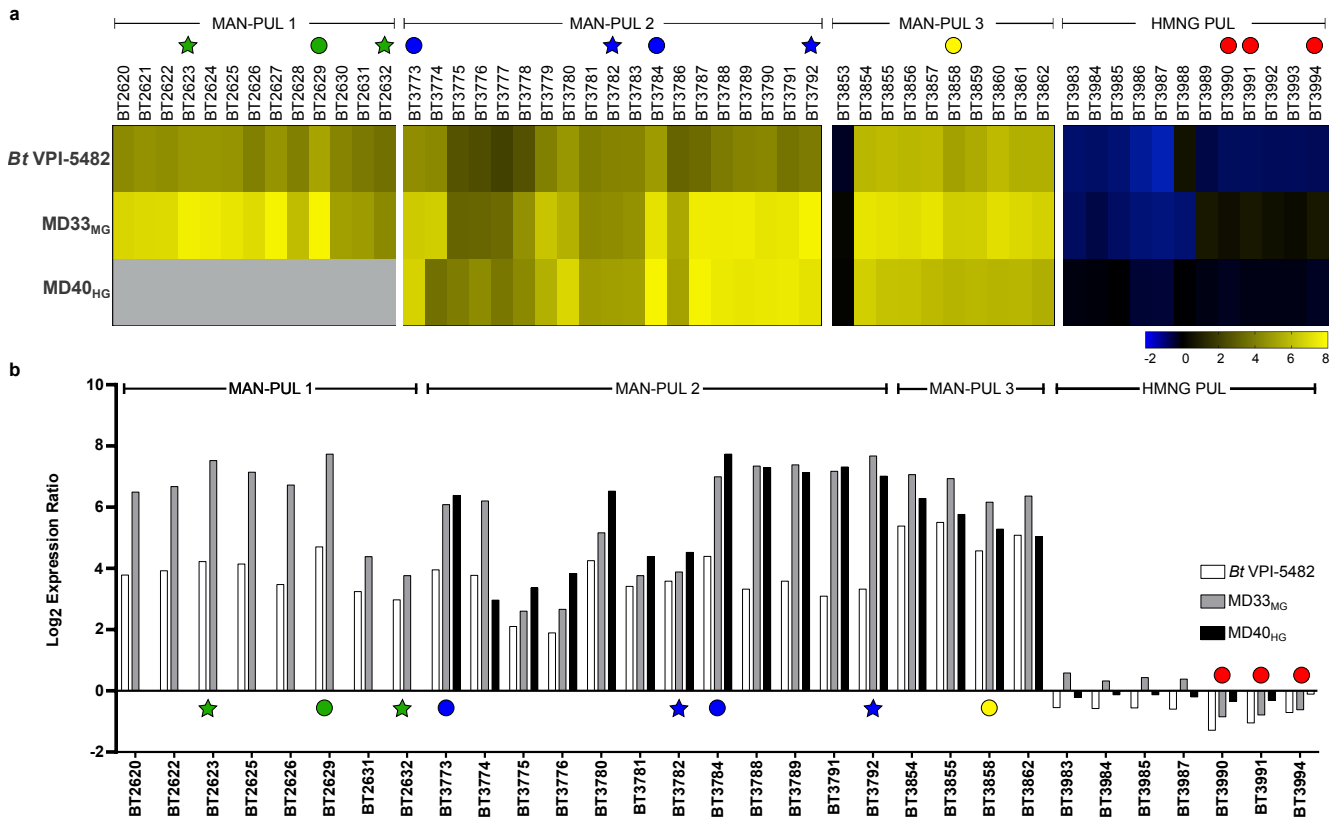

Supplemental Figure 6, Klassen and Reintjes et al., 2020

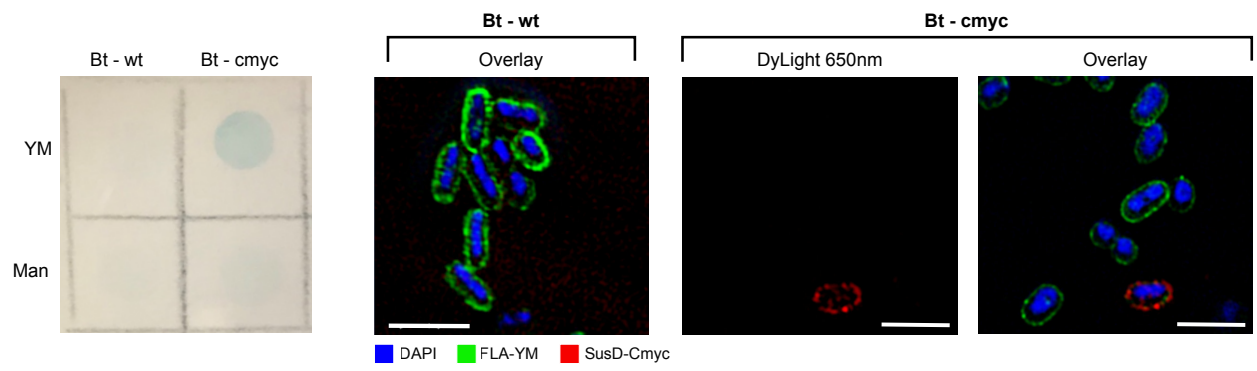

Supplemental Figure 7, Klassen and Reintjes et al., 2020

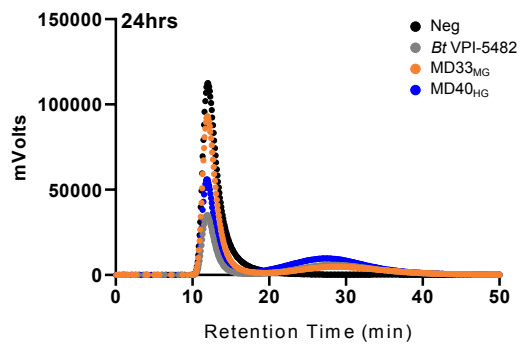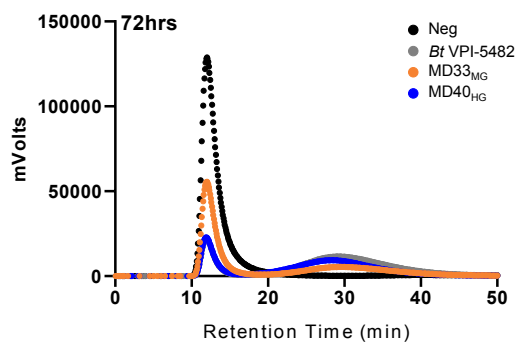

Supplement: 40168_2020_975_MOESM2_ESM.pdf [file 40168_2020_975_MOESM2_ESM.pdf]
