# Supplementary material for: Quantifying fluorescent glycan uptake to elucidate strain-level variability in foraging behaviors of rumen bacteria
Source: PubMed Central journal article supplement (PMC7825182; doi:10.1186/s40168-020-00975-x), 2021-01-22
Supplement: 40168_2020_975_MOESM3_ESM.pdf [file 40168_2020_975_MOESM3_ESM.pdf]

## 1 **Supplementary Discussion**

### 2 **Catabolite repression in *B. theta* when grown on YM.**

3 In addition to MAN-PUL activation, regions of gene repression were observed in each strain (Fig.  
4 5a). *Bt*VPI-5482 down-regulated ( $\log_2$  fold-change  $< -3.5$ ) many genes when grown on YM,  
5 including PUL22, which is predicted to target dietary fructans (*BT\_1758-1763*)[1, 2]. This  
6 response was observed in MD33<sub>MG</sub> and MD40<sub>HG</sub> for a homologous cluster of fructan-utilizing  
7 genes ( $\log_2$  fold-change  $< -3.5$ ), suggesting there may be a YM-catabolite repression effect with  
8 these two polysaccharides, as it was not observed when the cultures were grown on mannose. In  
9 MAN-PUL2, *BT\_3775-BT\_3776*, which encodes a biosynthetic gene cluster, displayed the lowest  
10 expression levels of all the MAN-PUL genes. This is consistent with what was reported previously  
11 [3]. Overall, the MD33<sub>MG</sub> transcriptome had more plasticity in the genes that were either induced  
12 or repressed in comparison other two strains (Fig. 5a).

13

### 14 **Expression levels of MAN-PULs**

15 Within each MAN-PUL, the *gh*, *susC*-like, and *susD*-like gene clusters consistently displayed the  
16 highest  $\log_2$  expression values (Fig. 5b, Supplementary Fig. 6). The *BT\_3788* (*susC*-like, 5.4) and  
17 *BT\_3789* (*susD*-like, 5.5) genes from MAN-PUL3 in *Bt*VPI-5482, *BT\_2629* (*gh92*, 7.7) and  
18 *BT\_3792* (*gh76*, 7.7) genes in MD33<sub>MG</sub>, and *BT\_3784* (*gh92*, 7.7) gene in MD40<sub>HG</sub> displayed the  
19 highest expression of all genes studied (Supplementary Fig. 6a).

20

### 21 **Host adaptation of *Bt*<sup>Bov</sup> strains**

22 We observed the presence of signature CAZymes that suggested these strains have adapted to  
23 colonize the bovine gut. For example, in every *Bt*<sup>Bov</sup> strain, two GH95s and two polysaccharide  
24 lyases from Family 8 are inserted into the host-glycan utilization locus PUL85, which differs from

25 the human-associated *Bt*VPI-5482 and 7330 strains (Supplementary Fig. 3). If such host-bacterium  
26 interactions are factors required for host colonization, these properties may be exploited for  
27 developing bovine-adapted probiotics.

28

## 29 **Supplementary Methods**

### 30 **Isolation of bovine-adapted mannan-degraders**

31 Three biological replicates for each sample were incubated anaerobically at 39°C on a rotary shaker  
32 for 24 h. Serial dilutions of the batch cultures ( $10^0$ - $10^{-6}$ ) were similarly streaked on YM plates.  
33 Plates were incubated anaerobically (atmosphere: 85% N<sub>2</sub>, 10% CO<sub>2</sub>, 5% H<sub>2</sub>) at 37°C for up to 96  
34 h. After 24-96 h of incubation, single colonies were selected and inoculated in nutrient rich Brain  
35 Heart Infusion (BHI) medium: 3.7% Bacto™ Brain Heart Infusion (BD; 237500), 8.3 mM L-  
36 cysteine, 10mL/L hemin (0.77 mM hemin in 0.01M NaOH), and 0.2% NaHCO<sub>3</sub>. Overnight  
37 cultures were centrifuged and resuspended in 0.8 mL glycerol (50%) and stored at -80°C.

### 38 **Growth profiling of bovine isolates**

39 TYG Ingredients: 1% Bacto™ Tryptone (BD; 211705), 0.5% Yeast Extract Bacteriological (VWR;  
40 J850), 4.1 mM L-cysteine, 0.2% glucose, 0.1 M KPO<sub>4</sub> pH 7.2, 2.2 μM vitamin K<sub>3</sub>, 40 μL/mL TYG  
41 Salts (2 mM MgSO<sub>4</sub>·7H<sub>2</sub>O, 119 mM NaHCO<sub>3</sub>, and 34.2 mM NaCl), 28.8 μM CaCl<sub>2</sub>, 1.4 μM  
42 FeSO<sub>4</sub>, 4.4 μM resazurin, 1 μL/mL (v/v) histidine/hematin (1.9 mM hematin, and 200 mM L-  
43 histidine, 1000X stock solution).

44 *Bacteroides* MM Ingredients: : 200 mL/L (v/v) 10X *Bacteroides* salts solution pH 7.2 (999 mM  
45 KH<sub>2</sub>PO<sub>4</sub>, 150 mM NaCl, 85 mM (NH<sub>4</sub>)<sub>2</sub>SO<sub>4</sub>), 20 mL/L (v/v) Balch's Vitamins pH 7.0 (36.5 μM  
46 p-aminobenzoic acid, 4.5 μM folic acid, 8.2 μM biotin, 40.6 μM nicotinic acid, 10.5 μM calcium  
47 pantothenate, 13.3 μM riboflavin, 14.8 μM thiamine HCl, 48.6 μM vitamin B<sub>6</sub>, 73.8 nM vitamin

48 B<sub>12</sub>, and 24.2 mM thioctic acid), 20 mL/L (v/v) Amino Acid Solution (5 mg/mL amino acids:  
49 alanine, arginine, asparagine, aspartic acid, cysteine, glutamic acid, glutamine, glycine, histidine,  
50 isoleucine, leucine, lysine, methionine, phenylalanine, proline, serine, threonine, tryptophan,  
51 tyrosine, and valine), 20 mL/L (v/v) Purine/Pyrimidine Solution pH 7.0 (1 mg/mL adenine,  
52 guanine, thymine, cytosine, and uracil), 20 mL/L (v/v) Trace Mineral Solution pH 7.0 (1.7 mM  
53 ethylenediaminetetraacetic acid, 12.2 mM MgSO<sub>4</sub>·7H<sub>2</sub>O, 3 mM MnSO<sub>4</sub>·H<sub>2</sub>O, 17.1 mM NaCl,  
54 359.7 μM FeSO<sub>4</sub>·7H<sub>2</sub>O, 901.1 μM CaCl<sub>2</sub>, 347.7 μM ZnSO<sub>4</sub>·7H<sub>2</sub>O, 40.1 μM CuSO<sub>4</sub>·5H<sub>2</sub>O, 161.7  
55 μM H<sub>3</sub>BO<sub>3</sub>, 41.3 μM Na<sub>2</sub>MoO<sub>4</sub>·2H<sub>2</sub>O, and 84.1 μM NiCl<sub>2</sub>·6H<sub>2</sub>O), 4.4 μM vitamin K<sub>3</sub>, 2.9 μM  
56 FeSO<sub>4</sub>·7H<sub>2</sub>O, 14.4 μM CaCl<sub>2</sub>, 2 mM MgCl<sub>2</sub>·6H<sub>2</sub>O, 7.4 pM vitamin B<sub>12</sub>, 16.5 mM L-cysteine, and  
57 2 μL/mL (v/v) histidine/hematin.

#### 58 **Extraction of YM from the cell wall of *S. pombe***

59 *S. pombe* was grown in 1 L Yeast Peptone Tryptone (YPD) medium at 30°C with shaking at 150  
60 rpm for 24 hours. Cells were harvested by centrifugation at 6,000 x g for 10 min. Pellets were  
61 resuspended in 10 mL 20 mM Citrate Buffer, pH 7.0 and autoclaved at 125°C for 90 min.  
62 Autoclaved cells were centrifuged at 10,000 x g for 10 min. Supernatant was stored at 4°C. Pellets  
63 were again resuspended in Citrate Buffer, autoclaved, and centrifuged. Supernatants were pooled  
64 and mixed with an equal volume of Fehling's Reagent. The solution was incubated at 40°C, 120  
65 rpm for 2 h. White precipitate formed in the solution and was harvested by centrifugation at 5,000  
66 x g for 10 min. Pellets were dissolved in 2 mL 3 M HCl (per pellet from 1 L of original culture).  
67 The solution was slowly transferred to 100 mL of 8:1 Methanol:Acetic Acid with gentle stirring  
68 and incubated for 15 min. White precipitate formed in the solution and was collected by  
69 centrifugation at 3,200 x g. Supernatant was discarded and the pellet was dissolved in 100 mL 8:1  
70 Methanol:Acetic Acid, vortexed briefly, and centrifuged at 1,500 x g for 5 min. This wash step

71 was performed two more times and then repeated an additional three times with 100% Methanol.  
72 After the final wash, the pellets were left to dry. The following day, the pellets were dissolved in  
73 Mq H<sub>2</sub>O and dialyzed (500-1,000 MWCO) in Mq H<sub>2</sub>O for 20 h. The dialyzed solution was then  
74 freeze dried and used for growth analysis.

#### 75 **Genome and 16S rDNA gene sequencing, assembly, and annotation of *Bt*<sup>Bov</sup> strains**

76 The 16S rDNA was PCR amplified using the following two primers:

77 Universal primer 27F: 5'-AGR GTT TGA TCM TGG CTC AG-3'

78 Universal primer 1492R: 5'-GGT TAC CTT GTT ACG ACT T-3'

79

#### 80 **RNA-seq: assembly, quantitation, and comparative analysis**

81 *Bt*VPI-5482, MD33<sub>MG</sub>, and MD40<sub>HG</sub> were each inoculated into three tubes containing 5 mL of  
82 TYG media. Overnight cultures of *Bt*VPI-5482, MD33<sub>MG</sub>, and MD40<sub>HG</sub> (OD<sub>600</sub> 1.0-1.4) were  
83 diluted with 2X MM to an OD<sub>600</sub> 0.05. 100 μL of 1% YM or mannose was added to six wells of  
84 diluted culture aliquoted from the same overnight stock, to a final volume of 200 μL. This step  
85 was repeated three times for a total of three replicates (each divided among six wells) for each  
86 bacterial strain and treatment. Cells were harvested during the exponential phase of the first growth  
87 phase (OD<sub>600</sub> 0.4-0.8). Six wells were pooled and added to an equal volume of RNAprotect  
88 (Qiagen). The mixture was vortexed for 5 sec and incubated for 5 min at room temperature. After  
89 incubation, the protected cells were centrifuged (10 min; 2,800 x g). The supernatant was decanted  
90 and pellets were stored at -80°C until further processing.

91 **Production of SusD-like protein C-myc fusion *B. theta* strain**

92 The 5' and 3' regions flanking the *BT\_3789* stop codon were amplified by PCR. Primers that  
93 contained the linker+C-myc nucleotide sequences were used to amplify the PCR products. These  
94 amplicons were then stitched together and ligated into a pEXchange plasmid. The plasmid was  
95 transformed into *E. coli* and conjugated into *Bt*VPI-5482  $\Delta$ tdk  $\Delta$ pul75 recipient strain. Insertion of  
96 the C-myc tag was confirmed by sanger sequencing.

97 **Generation of FLA-YM conjugates**

98 To chemically activate the polysaccharide, 350  $\mu$ L 0.81 M cyanogen bromide (CNBr; 97%; Sigma  
99 C91492) was added to 2 mL 2% YM. For  $\sim$ 5 min, pH was monitored and maintained above 9.5  
100 with additions of 0.25 M NaOH. Activated YM was separated from CNBr using Sephadex<sup>®</sup> G-50  
101 gel filtration medium in a column coupled to a Bio-Rad BioLogic LP Multistatic peristaltic pump  
102 (flow rate: 1 mL min<sup>-1</sup>). The mobile phase consisted of 0.2 M sodium tetraborate decahydrate pH  
103 8.0 ( $\geq$ 99.5%, Sigma S9640). Activated YM was eluted into a vial containing 2.0 mg  
104 fluoresceinamine Isomer II (FLA;  $\sim$ 95%; Sigma O7985) wrapped in aluminum foil and incubated  
105 for  $\sim$ 24 h at room temperature. To remove excess FLA and purify labelled YM, the reaction  
106 mixture was loaded onto Sartorius Vivaspin 15R columns (5,000 MWCO; VS15RH11) and  
107 centrifuged (210 x g). Columns were repeatedly topped up with distilled H<sub>2</sub>O and centrifuged until  
108 a clear filtrate was observed. The purified FLA-YM was lyophilized, covered in aluminum foil  
109 and stably stored ( $\sim$ 4°C) until further use.

110 **Visualization of FLA-YM uptake by strains of *Bt*<sup>Bov</sup>**

111 For microscopy, samples were resuspended in 1 ml 1 X PBS and, subsequently, 25  $\mu$ l was  
112 heat fixed at 40°C onto a poly-L-lysine coated glass cover slip (12 mm, #1.5H) (Thorlabs GmbH,

113 Germany). After heat fixation the samples were washed in MQ to remove additional salts and dried  
114 at 35°C. The samples were then counter stained with 4', 6-diamidino-2-phenylindole (DAPI) (1  
115 ng  $\mu\text{l}^{-1}$  WS) and Nile red (2 ng  $\mu\text{l}^{-1}$  WS) for 10 and 25 min, respectively. After each stain, the cells  
116 were washed in MQ and subsequently left to dry at RT. Finally, they were mounted onto glass  
117 slides using a 4:1 Citifluor (Electron Microscopy Sciences, USA) / VectaShield (Vector  
118 Laboratories, Germany) mounting solution.

119 For epifluorescence microscopy, the samples were visualised using a Zeiss Axioskop 2  
120 motplus fluorescence microscopy with a 100x oil objective. The cells were imaged using the  
121 Axiovision software (Zeiss, Germany) and a constant exposure time of 200 ms was applied for the  
122 FLA-YM channel (Alexa Fluor 488 filter cube) to enable a comparison of the FLA-YM signal.  
123 The subcellular localisation of FLA-YM within individual cells was achieved using a super-  
124 resolution structured illumination microscopy (SR-SIM). A Zeiss ELYRA PS.1 microscope with  
125 561, 488, 405 nm lasers and BP 573-613, BP 502-538, and BP 420-480 + LP 750 optical filters  
126 was used. Z-stack images were taken with a Plan-Apochromat x63/1.4 oil objective and processed  
127 with the ZEN2011 software (Carl Zeiss, Germany).

128

## 129 **Supplementary References**

- 130 1. Martens EC, Chiang HC, Gordon JI: **Mucosal glycan foraging enhances fitness and**  
131 **transmission of a saccharolytic human gut bacterial symbiont.** *Cell Host Microbe* 2008,  
132 **4:447-457.**
- 133 2. Sonnenburg ED, Zheng H, Joglekar P, Higginbottom SK, Firkbank SJ, Bolam DN, Sonnenburg  
134 JL: **Specificity of polysaccharide use in intestinal bacteroides species determines diet-**  
135 **induced microbiota alterations.** *Cell* 2010, **141:1241-1252.**
- 136 3. Martens EC, Lowe EC, Chiang H, Pudlo NA, Wu M, McNulty NP, Abbott DW, Henrissat B,  
137 Gilbert HJ, Bolam DN, Gordon JI: **Recognition and degradation of plant cell wall**  
138 **polysaccharides by two human gut symbionts.** *PLoS Biol* 2011, **9:e1001221.**
- 139 4. Altschul SF, Gish W, Miller W, Myers EW, Lipman DJ: **Basic local alignment search tool.** *J*  
140 *Mol Biol* 1990, **215:403-410.**
- 141 5. Jones DR, Thomas D, Alger N, Ghavidel A, Inglis GD, Abbott DW: **SACCHARIS: an**  
142 **automated pipeline to streamline discovery of carbohydrate active enzyme activities within**  
143 **polyspecific families and de novo sequence datasets.** *Biotechnol Biofuels* 2018, **11:27.**

144

145 **S1 Table: Alignment of 16S rDNA gene sequences from mannan-degrading *B. theta* strains**  
 146 **isolated from the rumen blasted against the NCBI database[4].**  
 147

| <b>Strain</b>            | <b>Top Blast Hit(s)</b>                  | <b>Query cover (%)</b> | <b>Identity (%)</b> |
|--------------------------|------------------------------------------|------------------------|---------------------|
| <b>MD11<sub>MG</sub></b> | <i>B. theta</i> VPI-5482 and strain 7330 | 100                    | 99.7                |
| <b>MD28<sub>MG</sub></b> | <i>B. theta</i> strain 7330              | 100                    | 99.7                |
| <b>MD33<sub>MG</sub></b> | <i>B. theta</i> VPI-5482                 | 100                    | 99.8                |
| <b>MD35<sub>MG</sub></b> | <i>B. theta</i> VPI-5482 and strain 7330 | 100                    | 99.7                |
| <b>MD8<sub>HG</sub></b>  | <i>B. theta</i> VPI-5482 and strain 7330 | 100                    | 99.7                |
| <b>MD13<sub>HG</sub></b> | <i>B. theta</i> VPI-5482 and strain 7330 | 100                    | 99.7                |
| <b>MD17<sub>HG</sub></b> | <i>B. theta</i> strain 7330              | 100                    | 99.7                |
| <b>MD40<sub>HG</sub></b> | <i>B. theta</i> strain DMF               | 100                    | 100                 |
| <b>MD51<sub>HG</sub></b> | <i>B. theta</i> strain 7330              | 100                    | 100                 |

148  
 149  
 150  
 151  
 152  
 153  
 154  
 155  
 156  
 157  
 158  
 159  
 160  
 161

162 **S2 Table: NCBI accession number and assembly parameters of bovine-associated bacterial**  
 163 **isolates.** SPAdes *de novo* genome assembly output of nine *Bt<sup>Bov</sup>* isolates sequenced by Illumina  
 164 MiSeq PE150bp and ANIb output of *Bt<sup>Bov</sup>* assembled contigs blasted to multiple *B. theta* strains  
 165 from the JSpeciesWS genome reference database.

| ACCESSION NUMBER | ISOLATE            | SOURCE | SPADES CONTIGS | SPADES LARGEST (BP) | SPADES N50 | ANIB STRAIN | ANIB (%) |
|------------------|--------------------|--------|----------------|---------------------|------------|-------------|----------|
| SAMN11961934     | MD8 <sub>HG</sub>  | Rumen  | 920            | 868,373             | 157,167    | VPI-5482    | 98.03    |
| SAMN11961935     | MD11 <sub>MG</sub> | Rumen  | 62             | 589,645             | 236,443    | VPI-5482    | 98.05    |
| SAMN11961936     | MD13 <sub>HG</sub> | Rumen  | 61             | 781,280             | 229,189    | KLE1254     | 99.16    |
| SAMN11961937     | MD17 <sub>HG</sub> | Rumen  | 59             | 928,731             | 208,464    | KLE1254     | 99.15    |
| SAMN11961938     | MD28 <sub>MG</sub> | Feces  | 63             | 838,230             | 236,443    | 7330        | 98.32    |
| SAMN11961939     | MD33 <sub>MG</sub> | Feces  | 72             | 759,138             | 150,716    | 7330        | 98.33    |
| SAMN11961940     | MD35 <sub>MG</sub> | Feces  | 70             | 723,774             | 145,695    | 7330        | 98.33    |
| SAMN11961941     | MD40 <sub>HG</sub> | Feces  | 62             | 519,222             | 189,229    | 7330        | 98.34    |
| SAMN11961942     | MD51 <sub>HG</sub> | Feces  | 62             | 868,373             | 229,189    | 7330        | 98.33    |

166 Number of contigs does not include contigs  $\leq$  1000 bp.  
 167



168  
169

**S3 Table: Statistical significance of RNAseq TPM expression differences between *Bt*VPI-5482, MD33<sub>MG</sub>, and MD40<sub>HG</sub> MAN-PUL genes when grown in YM.**

| Strain                             | TPM     | SEM  | <i>B. theta</i> | MD33 | MD40 |
|------------------------------------|---------|------|-----------------|------|------|
| <b><sup>1</sup><i>B. theta</i></b> | BT_2620 | 279  | 39              | !    | -    |
|                                    | BT_2622 | 720  | 96              | !    | -    |
|                                    | BT_2623 | 252  | 30              | !    | -    |
|                                    | BT_2625 | 660  | 106             | !    | -    |
|                                    | BT_2628 | 635  | 52              | !    | -    |
|                                    | BT_2629 | 2454 | 385             | !    | -    |
|                                    | BT_2631 | 398  | 64              | !    | -    |
|                                    | BT_2632 | 1087 | 105             | ns   | -    |
|                                    | BT_3773 | 179  | 18              | !    | !    |
|                                    | BT_3774 | 604  | 44              | !    | !    |
|                                    | BT_3775 | 1646 | 30              | !    | ns   |
|                                    | BT_3776 | 1832 | 62              | ns   | ns   |
|                                    | BT_3780 | 859  | 16              | !    | !    |
|                                    | BT_3781 | 1103 | 113             | ns   | ns   |
|                                    | BT_3782 | 414  | 18              | ns   | ns   |
|                                    | BT_3783 | 440  | 52              | !    | ns   |
|                                    | BT_3784 | 1834 | 154             | ns   | ns   |
|                                    | BT_3786 | 2594 | 64              | !    | ns   |
|                                    | BT_3789 | 2600 | 358             | !    | !    |
|                                    | BT_3791 | 265  | 40              | !    | !    |
| BT_3792                            | 602     | 45   | !               | !    |      |
| BT_3853                            | 20      | 2    | !               | ns   |      |
| BT_3855                            | 12      | 3    | !               | ns   |      |
| BT_3858                            | 24      | 4    | !               | ns   |      |
| BT_3862                            | 21      | 2    | !               | ns   |      |
| <b>MD33<sub>MG</sub></b>           | BT_2620 | 13   | 3               | !    | -    |
|                                    | BT_2622 | 16   | 2               | !    | -    |
|                                    | BT_2623 | 24   | 4               | !    | -    |
|                                    | BT_2625 | 804  | 93              | !    | -    |
|                                    | BT_2628 | 183  | 40              | !    | -    |
|                                    | BT_2629 | 2289 | 219             | !    | -    |
|                                    | BT_2631 | 877  | 46              | !    | -    |
|                                    | BT_2632 | 1045 | 300             | ns   | -    |
|                                    | BT_3773 | 1201 | 134             | !    | ns   |
|                                    | BT_3774 | 981  | 53              | !    | !    |
|                                    | BT_3775 | 941  | 157             | !    | ns   |
|                                    | BT_3776 | 1370 | 38              | ns   | ns   |
| BT_3780                            | 1635    | 142  | !               | !    |      |
| BT_3781                            | 1012    | 163  | ns              | ns   |      |
| BT_3782                            | 1566    | 144  | ns              | !    |      |

|                          |         |      |     |    |    |
|--------------------------|---------|------|-----|----|----|
|                          | BT_3783 | 1533 | 75  | !  | !  |
|                          | BT_3784 | 1301 | 257 | ns | ns |
|                          | BT_3786 | 1905 | 146 | !  | ns |
|                          | BT_3789 | 132  | 18  | !  | !  |
|                          | BT_3791 | 352  | 43  | !  | !  |
|                          | BT_3792 | 279  | 49  | !  | !  |
|                          | BT_3853 | 449  | 8   | !  | !  |
|                          | BT_3855 | 1394 | 45  | !  | !  |
|                          | BT_3858 | 826  | 102 | !  | !  |
|                          | BT_3862 | 326  | 23  | !  | !  |
|                          | BT_3773 | 1261 | 99  | !  | ns |
|                          | BT_3774 | 892  | 83  | !  | !  |
|                          | BT_3775 | 655  | 22  | ns | ns |
|                          | BT_3776 | 3754 | 533 | ns | ns |
|                          | BT_3780 | 1677 | 104 | !  | !  |
|                          | BT_3781 | 30   | 6   | ns | ns |
|                          | BT_3782 | 66   | 17  | ns | !  |
|                          | BT_3783 | 36   | 6   | ns | !  |
| <b>MD40<sub>HG</sub></b> | BT_3784 | 239  | 20  | ns | ns |
|                          | BT_3786 | 870  | 128 | ns | ns |
|                          | BT_3789 | 237  | 75  | !  | !  |
|                          | BT_3791 | 91   | 12  | !  | !  |
|                          | BT_3792 | 357  | 66  | !  | !  |
|                          | BT_3853 | 107  | 24  | ns | !  |
|                          | BT_3855 | 200  | 20  | ns | !  |
|                          | BT_3858 | 645  | 128 | ns | !  |
|                          | BT_3862 | 163  | 30  | ns | !  |

170

171 <sup>1</sup>*Bt*VPI-5482.

172

173

174  
175

**S4 Table. Percent identity matrix of the MAN-PUL2 SusC/D/E-like amino acid sequences from isolated strains generated by MUSCLE [76].**

| Strain                       | MD11 <sub>MG</sub> | MD28 <sub>MG</sub> | MD33 <sub>MG</sub> | MD35 <sub>MG</sub> | MD8 <sub>HG</sub> | MD13 <sub>HG</sub> | MD17 <sub>HG</sub> | MD40 <sub>HG</sub> | MD51 <sub>HG</sub> | <i>Bt</i> <sup>1</sup> |
|------------------------------|--------------------|--------------------|--------------------|--------------------|-------------------|--------------------|--------------------|--------------------|--------------------|------------------------|
| <b>SusC</b>                  |                    |                    |                    |                    |                   |                    |                    |                    |                    |                        |
| MD11 <sub>MG</sub>           | 100                | 100                | 100                | 100                | 77                | 77                 | 77                 | 77                 | 77                 | 77                     |
| MD28 <sub>MG</sub>           | 100                | 100                | 100                | 100                | 77                | 77                 | 77                 | 77                 | 77                 | 77                     |
| MD33 <sub>MG</sub>           | 100                | 100                | 100                | 100                | 77                | 77                 | 77                 | 77                 | 77                 | 77                     |
| MD35 <sub>MG</sub>           | 100                | 100                | 100                | 100                | 77                | 77                 | 77                 | 77                 | 77                 | 77                     |
| MD8 <sub>HG</sub>            | 77                 | 77                 | 77                 | 77                 | 100               | 100                | 100                | 100                | 100                | 100                    |
| MD13 <sub>HG</sub>           | 77                 | 77                 | 77                 | 77                 | 100               | 100                | 100                | 100                | 100                | 100                    |
| MD17 <sub>HG</sub>           | 77                 | 77                 | 77                 | 77                 | 100               | 100                | 100                | 100                | 100                | 100                    |
| MD40 <sub>HG</sub>           | 77                 | 77                 | 77                 | 77                 | 100               | 100                | 100                | 100                | 100                | 100                    |
| MD51 <sub>HG</sub>           | 77                 | 77                 | 77                 | 77                 | 100               | 100                | 100                | 100                | 100                | 100                    |
| <i>B. theta</i> <sup>1</sup> | 77                 | 77                 | 77                 | 77                 | 100               | 100                | 100                | 100                | 100                | 100                    |
| <b>SusD</b>                  |                    |                    |                    |                    |                   |                    |                    |                    |                    |                        |
| MD11 <sub>MG</sub>           | 100                | 100                | 100                | 100                | 81                | 81                 | 81                 | 81                 | 81                 | 81                     |
| MD28 <sub>MG</sub>           | 100                | 100                | 100                | 100                | 81                | 81                 | 81                 | 81                 | 81                 | 81                     |
| MD33 <sub>MG</sub>           | 100                | 100                | 100                | 100                | 80                | 80                 | 80                 | 80                 | 80                 | 80                     |
| MD35 <sub>MG</sub>           | 100                | 100                | 100                | 100                | 80                | 80                 | 80                 | 80                 | 80                 | 80                     |
| MD8 <sub>HG</sub>            | 81                 | 81                 | 80                 | 80                 | 100               | 100                | 100                | 100                | 100                | 100                    |
| MD13 <sub>HG</sub>           | 81                 | 81                 | 80                 | 80                 | 100               | 100                | 100                | 100                | 100                | 100                    |
| MD17 <sub>HG</sub>           | 81                 | 81                 | 80                 | 80                 | 100               | 100                | 100                | 100                | 100                | 100                    |
| MD40 <sub>HG</sub>           | 81                 | 81                 | 80                 | 80                 | 100               | 100                | 100                | 100                | 100                | 100                    |
| MD51 <sub>HG</sub>           | 81                 | 81                 | 80                 | 80                 | 100               | 100                | 100                | 100                | 100                | 100                    |
| <i>Bt</i> <sup>1</sup>       | 81                 | 81                 | 80                 | 80                 | 100               | 100                | 100                | 100                | 100                | 100                    |
| <b>SusE</b>                  |                    |                    |                    |                    |                   |                    |                    |                    |                    |                        |
| MD11 <sub>MG</sub>           | 100                | 100                | 99                 | 99                 | 78                | 78                 | 78                 | 78                 | 78                 | 78                     |
| MD28 <sub>MG</sub>           | 100                | 100                | 99                 | 99                 | 78                | 78                 | 78                 | 78                 | 78                 | 78                     |
| MD33 <sub>MG</sub>           | 99                 | 99                 | 100                | 100                | 78                | 78                 | 78                 | 78                 | 78                 | 78                     |
| MD35 <sub>MG</sub>           | 99                 | 99                 | 100                | 100                | 78                | 78                 | 78                 | 78                 | 78                 | 78                     |
| MD8 <sub>HG</sub>            | 78                 | 78                 | 78                 | 78                 | 100               | 100                | 100                | 100                | 100                | 100                    |
| MD13 <sub>HG</sub>           | 78                 | 78                 | 78                 | 78                 | 100               | 100                | 100                | 100                | 100                | 100                    |
| MD17 <sub>HG</sub>           | 78                 | 78                 | 78                 | 78                 | 100               | 100                | 100                | 100                | 100                | 100                    |
| MD40 <sub>HG</sub>           | 78                 | 78                 | 78                 | 78                 | 100               | 100                | 100                | 100                | 100                | 100                    |
| MD51 <sub>HG</sub>           | 78                 | 78                 | 78                 | 78                 | 100               | 100                | 100                | 100                | 100                | 100                    |
| <i>Bt</i> <sup>1</sup>       | 78                 | 78                 | 78                 | 78                 | 100               | 100                | 100                | 100                | 100                | 100                    |

176  
177

<sup>1</sup>*Bt* = *Bt*VPI-5482. Grey shading represents conservation ≥100%.

178 **Supplementary Figure Legends**

179 **Supplementary Fig. 1 Differential glycan utilization of *Bt* strains.** Growth profiles of *Bt*VPI-  
180 5482, *Bt*ΔMAN-PUL1/2/3, and nine rumen isolates grown on 0.5% YM extracted from the cell  
181 wall of (a) *S. cerevisiae* (N=4) and (b) *S. pombe* (N=3). Mean ± standard deviation shown.

182  
183 **Supplementary Fig. 2 Comparative uptake of FLA-YM by *Bt* strains over time.** (a) Single  
184 cell measurements from pure cultures of *Bt*VPI-5482, MD33<sub>MG</sub>, and MD40<sub>HG</sub>. Grey represents  
185 cells incubated with YM-MM. Orange shows cells incubated with unconjugated FLA. Blue  
186 indicates cells incubated with FLA-YM for the time noted. Graphical representation of how flow  
187 cytometry data was gated, with cells above a certain threshold assigned the FLA-YM positive  
188 status. N=10.000. (b) Epifluorescence images of MD33<sub>MG</sub> (left), and MD40<sub>HG</sub> (right) incubated  
189 with FLA-YM for 0 min, 5 min, and 60 min. Cells were counter stained with DAPI and Nile Red.  
190 Scale bar is 10 μm.

191  
192 **Supplementary Fig. 3 CAZyme updates to PUL85 in the genomes of the *Bt*<sup>Bov</sup> isolates.** Grey  
193 triangles represent gene inserts into the *Bt*<sup>Bov</sup> PUL85-like region relative to *Bt*VPI-5482 PUL85.

194  
195 **Supplementary Fig. 4 CAZyme analysis of GH92 and GH76.** (a) Synteny of MAN-PUL1/2/3  
196 and HMNG-PUL of *B. theta* and nine *Bt*<sup>Bov</sup> strains. Length of genes are to scale and arrows indicate  
197 directionality. GH76s are indicated with coloured triangles, whereas GH92s are indicated with  
198 coloured circles. MAN-PUL1 = Green, MAN-PUL2 = Blue, MAN-PUL3 = Yellow, and the  
199 HMNG-PUL = Red. (b) GH92s and (c) GH76s characterized and predicted sequences from *Bt*<sup>Bov</sup>  
200 genomes generated with SACCHARIS[5]. Large trees (left) show all characterized GH92 or GH76  
201 enzymes from CAZy and those within the *Bt*VPI-5482 genome, as well as the homologous MAN-  
202 PUL enzymes from the *Bt*<sup>Bov</sup> isolates. Smaller trees display all the characterized GH92 or GH76  
203 enzymes from CAZy, with all of the predicted GH92/76 enzymes found in the genomes of the  
204 *Bt*<sup>Bov</sup> strain noted above the tree. Outer ring represents characterized specificities (see legend).  
205 Circles (GH92) and stars (GH76) represent sequences from PULs: Green = MAN-PUL1, Blue =  
206 MAN-PUL2, Yellow = MAN-PUL3, Red = HMNG PUL, and White = PUL55. Numbers in  
207 parenthesis indicate the total number of enzymes within each strain.

208

209 **Supplementary Fig. 5 Growth profiles of *Bt*<sup>Bov</sup> cultures supplemented with GH76**  
210 **recombinant enzymes.** MD33<sub>MG</sub> and MD40<sub>HG</sub> cells cultured in YM-MM supplemented with BSA  
211 control protein, *Bt*<sup>Bov</sup> GH76 from PUL55 (BtGH76-MD40), or GH76 from MAN-PUL2 (GH76-  
212 BT3782).

213  
214 **Supplementary Fig. 6 Expression of MAN-PUL gene products in *Bt*VPI-5482, MD33<sub>MG</sub>, and**  
215 **MD40<sub>HG</sub>. (a)** Expression levels of MAN-PUL1/2/3 and HMNG-PUL genes. Grey represents gene  
216 transcripts not present in the corresponding genome. **(b)** Transcript expression of MAN-PUL1/2/3  
217 in *Bt*VPI-5482, MD33<sub>MG</sub>, and MD40<sub>HG</sub>. Bar graph represents log<sub>2</sub> fold-change of CAZymes and  
218 SusC/D/E-like proteins in MAN-PUL1/2/3 and HMNG-PUL encoded in the genomes of *Bt*VPI-  
219 5482 (white), MD33<sub>MG</sub> (grey), and MD40<sub>HG</sub> (black). GH76 enzymes indicated by stars. GH92  
220 enzymes indicated by circles. MAN-PUL1 = green. MAN-PUL2 = blue. MAN-PUL3 = yellow.  
221 HMNG-PUL = red.

222  
223 **Supplementary Fig. 7 Co-localization of epitope tagged SusD membrane protein and FLA-**  
224 **YM staining in *Bt*VPI-5482 cells.** Dot blot showing YM-MM (YM) or mannose (Man) cultures  
225 of *Bt*Δtdk Δpul75 and a mutant strain with a C-Myc fused SusD-like protein. SR-SIM of *Bt*Δtdk  
226 Δpul75 (Bt – wt) stained with DAPI and FLA-YM. SR-SIM of the C-Myc mutant (Bt – cmyc)  
227 showing DyLight antibody signal and co-stained with DAPI and FLA-YM. Scales shown are 2  
228 μm.

229  
230 **Supplementary Fig. 8 Product profiles of YM utilization in the supernatants of *Bt*<sup>Bov</sup>**  
231 **isolates.** Chromatograms of hydrolysis products in the supernatants of *Bt*VPI-5482, MD33<sub>MG</sub>,  
232 and MD40<sub>HG</sub> when incubated in FLA-YM for 24 hrs (top) and 72 hrs (bottom).

233
